# Supplementary material for: Diagnostic accuracy of semiquantitative point of care urine albumin to creatinine ratio and urine dipstick analysis in a primary care resource limited setting in South Africa
Source: PubMed Central journal article supplement (PMC7981803; doi:10.1186/s12882-021-02290-5), 2021-03-20
Supplement: 12882_2021_2290_MOESM2_ESM.pdf [file 12882_2021_2290_MOESM2_ESM.pdf]

# Phase 1: FW questionnaire CKD risk - family

Agincourt HDSS study number

\_\_\_\_\_

Date

\_\_\_\_\_

Time

\_\_\_\_\_

Have you heard of high blood pressure/hypertension/hi-hi?  
"Xana mi tshame mi twa hi ntlakuko wa ngati/hypertension/hi hi?"

- no  
 yes  
 dont know

Have you heard of chronic kidney disease/kidney failure?  
" Xana mi tshama mi twa hi vuvabyi bya tinso lebyi nga tshungulekiki/ ku tsandzeka ku tirha ka tinso?"

- no  
 yes  
 dont know

**Has any family member (your parents, your brothers/sisters, or any of your children) ever had or do they currently have any of the following diseases?**

Diabetes or high sugar  
"Mavabyi ya chukele kumbe chukele leri nga henhla"

- no  
 yes  
 dont know

Who?  
"Kutani hi wihi?"

- parent/s  
 brother/s and/or sisters  
 child/children  
 other  
 dont know

Hypertension or high blood pressure  
"Hypertension kumbe ntlakuko wa ngati"

- no  
 yes  
 don't know

Who?  
"Kutani hi wihi?"

- parent/s  
 brother/s and/or sisters  
 child/children  
 other  
 dont know

Heart disease  
"Vuvabyi bya mbilu"

- no  
 yes  
 dont know

Who?  
"Kutani hi wihi?"

- parent/s  
 brother/s and/or sisters  
 child/children  
 other  
 dont know

---

Chest pain or angina  
"Ku vava ka xifuva kumbe angina"

no  
 yes  
 dont know

---

Who?  
"Kutani hi wihi?"

parent/s  
 brother/s and/or sisters  
 child/children  
 other  
 dont know

---

High cholesterol  
"Mafurha yo tala"

no  
 yes  
 dont know

---

Who?  
"Kutani hi wihi?"

parent/s  
 brother/s and/or sisters  
 child/children  
 other  
 dont know

---

Chronic kidney disease or kidney failure  
"Vuvabyi bya tinso lebyi nga tshungulekiki /ku tsandzeka ku tirha ka tinso"

no  
 yes  
 dont know

---

Who?  
"Kutani hi wihi?"

parent/s  
 brother/s and/or sisters  
 child/children  
 other  
 dont know

---

Stroke  
"Xiome"

no  
 yes  
 dont know

---

Who?  
"Kutani hi wihi?"

parent/s  
 brother/s and/or sisters  
 child/children  
 other  
 dont know

---

Completed by \_\_\_\_\_
